# Supplementary material
Source: MDPI journal article supplement (https://www.mdpi.com/2073-4395/13/1/221)
Supplement: s1 [file s1]

# Supplemental materials

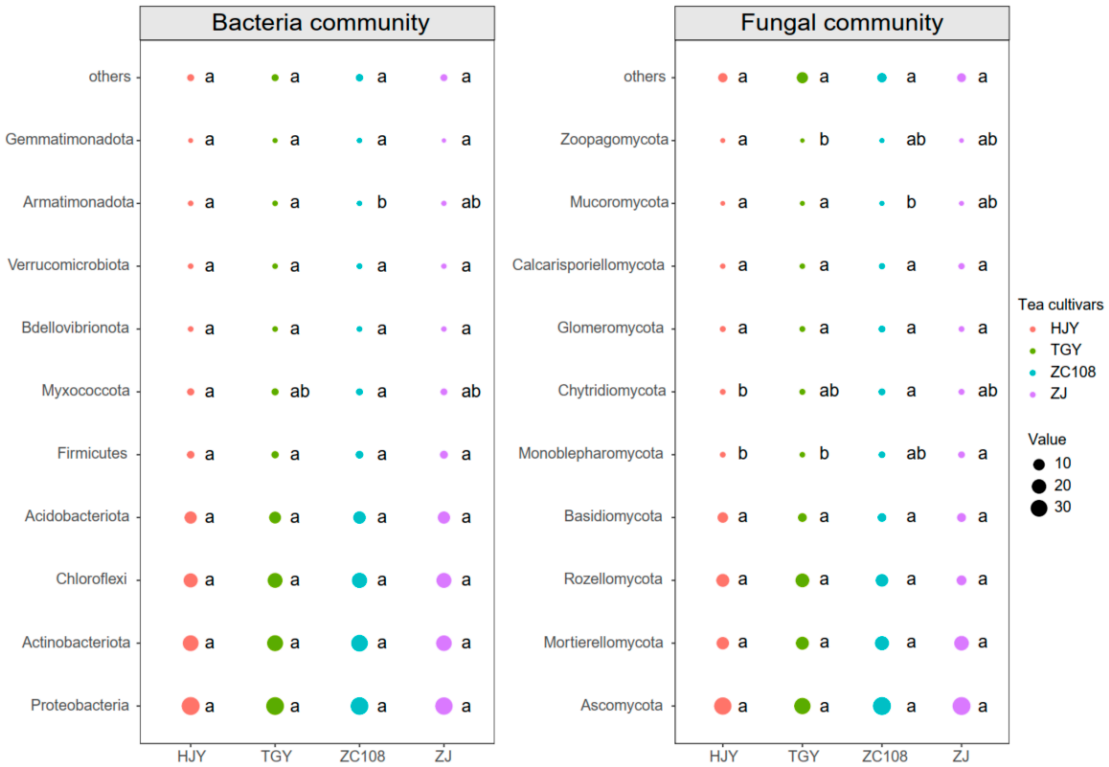

**Figure. S1** Bubble plots shows the relative abundance of the top 10 bacterial (left panel) and fungal composition (right panel) at the phylum levels in the tea plantation soils under different tea cultivars. The size of the bubble corresponds to the relative abundance of microbial taxa. Different lowercase letters on the right of the bubbles indicate significant differences among the treatments (one-way ANOVA test,  $p < 0.05$ ).

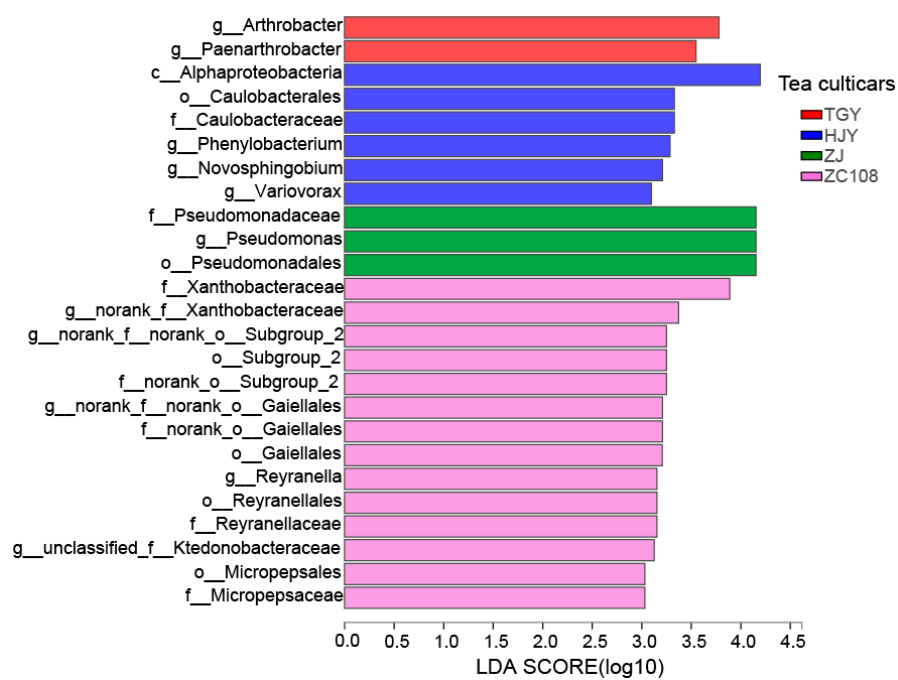

**Figure S2** Histogram of the LDA scores computed for differentially abundant of soil bacteria under different tea cultivars planting.

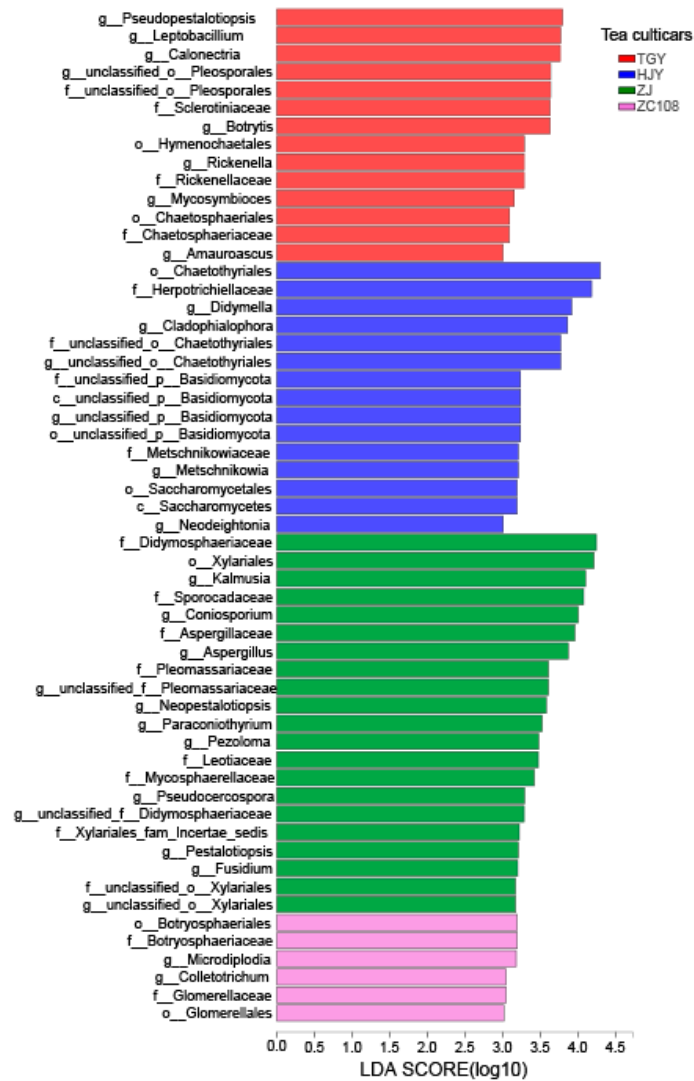

**Figure S3** Histogram of the LDA scores computed for differentially abundant of soil fungi under different tea cultivars planting.

**Table S1** The correlations of bacterial and fungal community composition at the phylum levels.

| Parameters        | Ascm<br>ycota | Mortierell<br>omycota | Rozello<br>mycota | Basidio<br>mycota | Monobleph<br>aromycota | Chytridio<br>mycota | Glomero<br>mycota | Calcarisporie<br>llomycota | Mucoro<br>mycota | Zoopago<br>mycota |
|-------------------|---------------|-----------------------|-------------------|-------------------|------------------------|---------------------|-------------------|----------------------------|------------------|-------------------|
| Proteobacteria    | -0.36         | -0.16                 | <b>0.423*</b>     | 0.04              | -0.08                  | -0.26               | -0.33             | 0.16                       | 0.23             | 0.23              |
| Actinobacteriota  | 0.34          | -0.12                 | -0.13             | 0.07              | 0.18                   | 0.18                | 0.33              | -0.00                      | <b>-0.42*</b>    | 0.15              |
| Chloroflexi       | 0.069         | 0.27                  | -0.36             | 0.02              | -0.22                  | 0.10                | 0.07              | -0.21                      | 0.02             | -0.38             |
| Acidobacteriota   | <b>-0.42*</b> | -0.05                 | <b>0.49*</b>      | -0.31             | 0.17                   | -0.03               | -0.28             | 0.19                       | 0.35             | 0.11              |
| Firmicutes        | <b>0.41*</b>  | 0.16                  | -0.36             | -0.01             | <b>0.44*</b>           | -0.13               | -0.16             | 0.08                       | 0.30             | 0.34              |
| Myxococcota       | -0.15         | <b>-0.55**</b>        | 0.38              | 0.29              | <b>-0.44*</b>          | <b>-0.65**</b>      | 0.11              | 0.01                       | -0.05            | -0.01             |
| Bdellovibrionota  | -0.12         | <b>-0.57**</b>        | <b>0.48*</b>      | 0.20              | -0.25                  | <b>-0.54**</b>      | 0.07              | 0.28                       | -0.02            | 0.10              |
| Verrucomicrobiota | <b>-0.42*</b> | -0.09                 | 0.32              | -0.05             | -0.27                  | -0.19               | -0.13             | 0.18                       | 0.03             | -0.28             |
| Armatimonadota    | -0.29         | <b>-0.60**</b>        | <b>0.50*</b>      | 0.23              | -0.20                  | -0.47*              | -0.04             | 0.02                       | 0.00             | -0.14             |
| Gemmatimonadota   | 0.03          | -0.36                 | 0.26              | 0.15              | -0.05                  | -0.03               | 0.09              | 0.09                       | -0.12            | 0.19              |

Significant correlations (\*\*,  $p < 0.01$  and \*,  $p < 0.05$ ) are shown in bold

**Table S2** The correlations of Chao1, Shannon index and composition (phylum level) of soil bacterial community with soil properties.

| Parameters        | pH            | NH <sub>4</sub> <sup>+</sup> | NO <sub>3</sub> <sup>-</sup> | AP             | AK            | TP            | TK             | SOC           | TN             | C/N          | SFI   |
|-------------------|---------------|------------------------------|------------------------------|----------------|---------------|---------------|----------------|---------------|----------------|--------------|-------|
| Chao1             | 0.06          | -0.20                        | 0.19                         | 0.21           | 0.21          | -0.19         | 0.21           | <b>0.53**</b> | <b>0.42*</b>   | <b>0.52*</b> | -0.38 |
| Shannon           | 0.27          | -0.31                        | -0.29                        | 0.29           | <b>0.44*</b>  | -0.09         | <b>0.50*</b>   | <b>0.61**</b> | <b>0.64**</b>  | 0.34         | -0.15 |
| Proteobacteria    | -0.02         | <b>-0.42*</b>                | -0.38                        | <b>0.58**</b>  | <b>0.41*</b>  | 0.10          | 0.33           | 0.28          | 0.33           | 0.11         | 0.02  |
| Actinobacteriota  | -0.38         | -0.28                        | 0.07                         | 0.16           | -0.33         | 0.30          | 0.05           | 0.06          | 0.11           | -0.07        | 0.24  |
| Chloroflexi       | <b>0.44*</b>  | <b>0.73**</b>                | 0.25                         | <b>-0.73**</b> | 0.02          | -0.36         | <b>-0.55**</b> | <b>-0.47*</b> | <b>-0.54**</b> | -0.20        | -0.01 |
| Acidobacteriota   | -0.18         | <b>-0.49*</b>                | -0.11                        | <b>0.42*</b>   | 0.08          | -0.12         | <b>0.56**</b>  | <b>0.46*</b>  | 0.42*          | 0.39         | -0.36 |
| Firmicutes        | <b>-0.45*</b> | -0.23                        | -0.09                        | 0.25           | -0.37         | <b>0.58**</b> | 0.22           | 0.19          | 0.28           | -0.01        | -0.25 |
| Myxococcota       | <b>0.72**</b> | 0.34                         | -0.24                        | -0.01          | <b>0.57**</b> | 0.02          | 0.08           | -0.01         | -0.03          | 0.03         | -0.01 |
| Bdellovibrionota  | 0.29          | -0.09                        | <b>-0.49*</b>                | <b>0.41*</b>   | <b>0.46*</b>  | 0.24          | 0.30           | 0.15          | 0.18           | 0.07         | -0.04 |
| Verrucomicrobiota | 0.40          | -0.12                        | -0.02                        | 0.24           | <b>0.55**</b> | -0.28         | 0.22           | 0.20          | 0.21           | 0.15         | -0.19 |
| Armatimonadota    | 0.34          | -0.10                        | -0.21                        | 0.32           | <b>0.47*</b>  | 0.03          | 0.22           | 0.12          | 0.07           | 0.16         | -0.18 |
| Gemmatimonadota   | -0.21         | -0.32                        | -0.12                        | 0.30           | -0.16         | 0.27          | 0.27           | 0.27          | 0.24           | 0.20         | 0.10  |

Significant correlations (\*\*,  $p < 0.01$  and \*,  $p < 0.05$ ) are shown in bold.

**Table S3** The correlations of Chao1, Shannon index and composition (phylum level) of soil fungal community with soil properties.

| Parameters             | pH             | NH <sub>4</sub> <sup>+</sup> | NO <sub>3</sub> <sup>-</sup> | AP            | AK             | TP            | TK            | SOC           | TN            | C/N           | SFI   |
|------------------------|----------------|------------------------------|------------------------------|---------------|----------------|---------------|---------------|---------------|---------------|---------------|-------|
| Chao1                  | <b>0.50*</b>   | 0.15                         | -0.16                        | 0.08          | <b>0.56**</b>  | -0.33         | 0.25          | 0.34          | 0.30          | 0.29          | -0.18 |
| Shannon                | -0.09          | 0.13                         | 0.02                         | -0.19         | -0.16          | -0.18         | -0.16         | <b>-0.47*</b> | <b>-0.48*</b> | -0.29         | -0.01 |
| Ascomycota             | -0.13          | 0.05                         | -0.30                        | -0.07         | -0.40          | 0.39          | -0.04         | -0.13         | -0.03         | -0.23         | 0.03  |
| Mortierellomycota      | -0.36          | 0.09                         | <b>0.43*</b>                 | -0.10         | -0.23          | -0.25         | -0.11         | -0.33         | -0.21         | -0.38         | -0.07 |
| Rozellomycota          | 0.22           | -0.15                        | -0.23                        | 0.24          | 0.37           | -0.08         | 0.21          | <b>0.49*</b>  | 0.31          | <b>0.58**</b> | -0.06 |
| Basidiomycota          | 0.22           | 0.05                         | -0.08                        | -0.19         | 0.28           | -0.05         | 0.05          | -0.40         | -0.30         | <b>-0.46*</b> | 0.40  |
| Monoblepharomycota     | <b>-0.67**</b> | -0.31                        | 0.06                         | 0.07          | <b>-0.59**</b> | 0.11          | -0.06         | -0.15         | -0.18         | -0.06         | -0.36 |
| Chytridiomycota        | <b>-0.54**</b> | -0.15                        | <b>0.49*</b>                 | -0.18         | <b>-0.41*</b>  | <b>-0.44*</b> | -0.19         | -0.21         | -0.27         | -0.07         | -0.31 |
| Glomeromycota          | 0.35           | 0.38                         | -0.16                        | <b>-0.43*</b> | 0.21           | -0.04         | -0.23         | 0.09          | 0.12          | -0.02         | 0.23  |
| Calcarisporiellomycota | -0.25          | -0.28                        | -0.28                        | 0.16          | -0.47*         | 0.15          | 0.15          | 0.04          | -0.00         | 0.10          | -0.14 |
| Mucoromycota           | -0.18          | 0.08                         | -0.08                        | 0.30          | -0.06          | 0.00          | <b>0.52**</b> | 0.07          | 0.16          | -0.07         | -0.12 |
| Zoopagomycota          | -0.40          | -0.33                        | 0.09                         | <b>0.52**</b> | -0.04          | 0.20          | 0.34          | 0.13          | 0.26          | -0.10         | 0.06  |

Significant correlations (\*\*,  $p < 0.01$  and \*,  $p < 0.05$ ) are shown in bold.

**Table S4** The correlations of bacterial predicted function and fungal predicted function with soil properties.

| Parameters                   | Bacterial predicted function |               |               | Fungal predicted function |            |             |
|------------------------------|------------------------------|---------------|---------------|---------------------------|------------|-------------|
|                              | C-cycling                    | N-cycling     | S-cycling     | Pathotroph                | Saprotroph | Symbiotroph |
| pH                           | <b>-0.66**</b>               | <b>0.51*</b>  | 0.31          | -0.03                     | -0.02      | -0.10       |
| NH <sub>4</sub> <sup>+</sup> | -0.20                        | 0.10          | 0.26          | 0.26                      | -0.02      | -0.01       |
| NO <sub>3</sub> <sup>-</sup> | 0.12                         | -0.09         | 0.09          | -0.01                     | -0.19      | -0.29       |
| AP                           | 0.01                         | -0.14         | -0.11         | -0.08                     | -0.25      | 0.13        |
| AK                           | <b>-0.76**</b>               | <b>0.59**</b> | <b>0.41*</b>  | -0.16                     | -0.28      | -0.22       |
| TP                           | 0.35                         | -0.38         | 0.02          | -0.12                     | 0.32       | -0.04       |
| TK                           | -0.28                        | 0.24          | 0.04          | -0.02                     | -0.20      | 0.33        |
| SOC                          | -0.11                        | -0.02         | -0.16         | <b>-0.52*</b>             | 0.03       | 0.22        |
| TN                           | -0.19                        | 0.123         | 0.05          | <b>-0.47*</b>             | 0.17       | 0.14        |
| C/N                          | 0.05                         | -0.24         | <b>-0.44*</b> | <b>-0.43*</b>             | -0.17      | 0.25        |
| SFI                          | -0.02                        | -0.04         | 0.28          | -0.02                     | 0.08       | 0.14        |

Significant correlations (\*\*,  $p < 0.01$  and \*,  $p < 0.05$ ) are shown in bold.

**Table S5** The correlations of bacterial predicted function and fungal predicted function with community composition of soil bacteria and fungi.

| Parameters                             | Bacterial predicted function |                |               | Fungal predicted function |               |              |
|----------------------------------------|------------------------------|----------------|---------------|---------------------------|---------------|--------------|
|                                        | C-cycling                    | N-cycling      | S-cycling     | Pathotroph                | Saprotroph    | Symbiotroph  |
| <b>Bacterial community composition</b> |                              |                |               |                           |               |              |
| Proteobacteria                         | -0.39                        | 0.26           | -0.01         | -0.13                     | -0.23         | -0.07        |
| Actinobacteriota                       | <b>0.42*</b>                 | -0.2           | 0.28          | 0.04                      | 0.13          | 0.18         |
| Chloroflexi                            | -0.09                        | 0.06           | -0.01         | 0.19                      | 0.16          | -0.07        |
| Acidobacteriota                        | -0.15                        | -0.01          | <b>-0.47*</b> | -0.31                     | -0.32         | -0.08        |
| Firmicutes                             | <b>0.44*</b>                 | <b>-0.46*</b>  | -0.19         | -0.03                     | 0.29          | -0.01        |
| Myxococcota                            | <b>-0.49*</b>                | 0.36           | 0.11          | -0.01                     | -0.25         | -0.22        |
| Bdellovibrionota                       | <b>-0.41*</b>                | 0.28           | 0.08          | 0.01                      | -0.33         | -0.09        |
| Verrucomicrobiota                      | <b>-0.68**</b>               | <b>0.49*</b>   | 0.18          | -0.23                     | -0.25         | -0.07        |
| Armatimonadota                         | <b>-0.42*</b>                | 0.26           | -0.12         | 0.30                      | <b>-0.45*</b> | -0.07        |
| Gemmatimonadota                        | 0.09                         | -0.02          | 0.24          | 0.04                      | 0.01          | <b>0.44*</b> |
| <b>Fungal community composition</b>    |                              |                |               |                           |               |              |
| Ascomycota                             | 0.39                         | -0.23          | -0.13         | 0.23                      | <b>0.62**</b> | 0.27         |
| Mortierellomycota                      | 0.20                         | -0.23          | 0.12          | -0.05                     | 0.03          | -0.19        |
| Rozellomycota                          | -0.34                        | 0.22           | -0.15         | -0.32                     | <b>-0.44*</b> | 0.05         |
| Basidiomycota                          | -0.16                        | 0.29           | 0.35          | 0.4                       | 0.02          | -0.07        |
| Monoblepharomycota                     | <b>0.67**</b>                | <b>-0.53**</b> | -0.34         | 0.09                      | 0.05          | -0.17        |
| Chytridiomycota                        | 0.33                         | -0.14          | -0.04         | -0.04                     | -0.18         | -0.07        |
| Glomeromycota                          | -0.09                        | 0.2            | 0.28          | -0.04                     | 0.16          | -0.10        |
| Calcarisporiellomycota                 | 0.27                         | -0.16          | -0.25         | 0.00                      | 0.16          | 0.18         |
| Mucoromycota                           | -0.22                        | 0.10           | 0.01          | 0.07                      | -0.15         | 0.28         |
| Zoopagomycota                          | 0.16                         | -0.13          | -0.06         | -0.19                     | -0.11         | -0.12        |

Significant correlations (\*\*,  $p < 0.01$  and \*,  $p < 0.05$ ) are shown in bold
